# Supplementary material for: In-situ plasmon-driven chemical reactions revealed by high vacuum tip-enhanced Raman spectroscopy
Source: PubMed Central journal article supplement — Sci Rep. 2012 Sep 11;2:647. doi: 10.1038/srep00647 (PMC3438462; doi:10.1038/srep00647), 2012-09-11
Supplement: srep00647-s1.pdf [file srep00647-s1.pdf]

# In-situ plasmon-driven chemical reactions revealed by high vacuum tip-enhanced Raman spectroscopy

Mengtao Sun,<sup>1</sup> Zhenglong Zhang,<sup>1,2</sup> Hairong Zheng,<sup>2</sup> Hongxing Xu<sup>1,\*</sup>

<sup>1</sup> Beijing National Laboratory for Condensed Matter Physics, Institute of Physics, Chinese Academy of Sciences, P. O. Box 603-146, Beijing, 100190, People's Republic of China.

<sup>2</sup> College of Physics and Information Technology, Shaanxi Normal University, Xi'an, 710062, People's Republic of China.

Correspondence and requests for materials should be addressed to H.X.X. (email:

[hxxu@iphy.ac.cn](mailto:hxxu@iphy.ac.cn)).

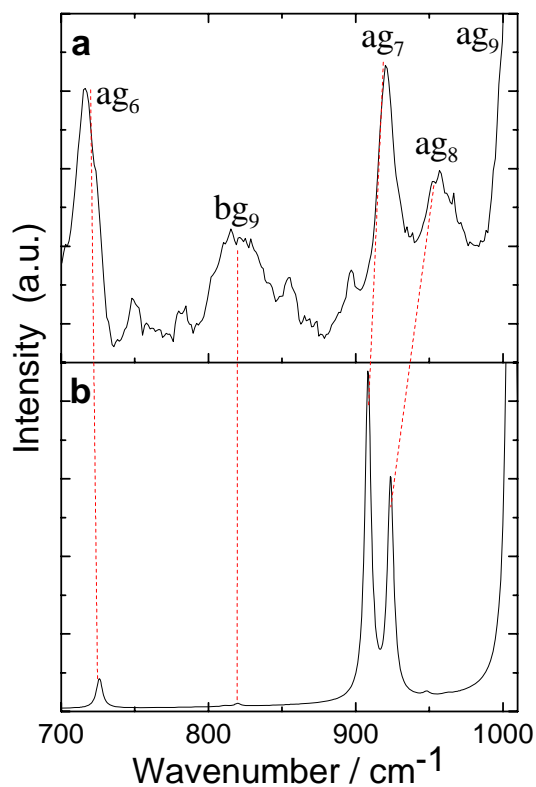

Figure. S1 (a) the TERS and (b) the simulated Raman spectrum of DMAB at low frequencies.

**Theoretical simulations.** To assign these Raman peaks in Fig. 2, the quantum chemical calculations on Raman spectra of DMAB were done with density functional theory (DFT),<sup>[a]</sup> PW91 functional and TZP basis set, using ADF suite.<sup>[b]</sup>

References:

[a]. Dreizler, M.R., Gross, E. K.U. Density Functional Theory, Springer-Verlag, Heidelberg, 1990.

[b]. Amsterdam Density Functional, version 2011, [www.scm.com](http://www.scm.com).

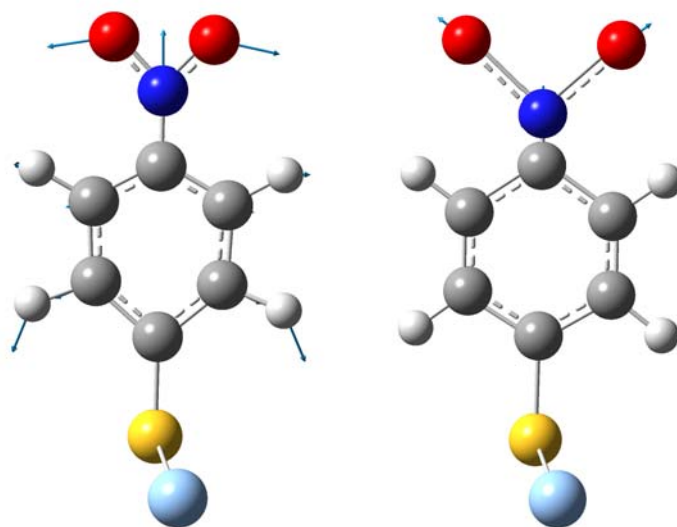

854cm<sup>-1</sup>

1336 cm<sup>-1</sup>

Figure. S2. The vibrational modes of 4NBT adsorbed on Ag at 854 cm<sup>-1</sup> (bending) and 1336 cm<sup>-1</sup> (stretching), respectively.

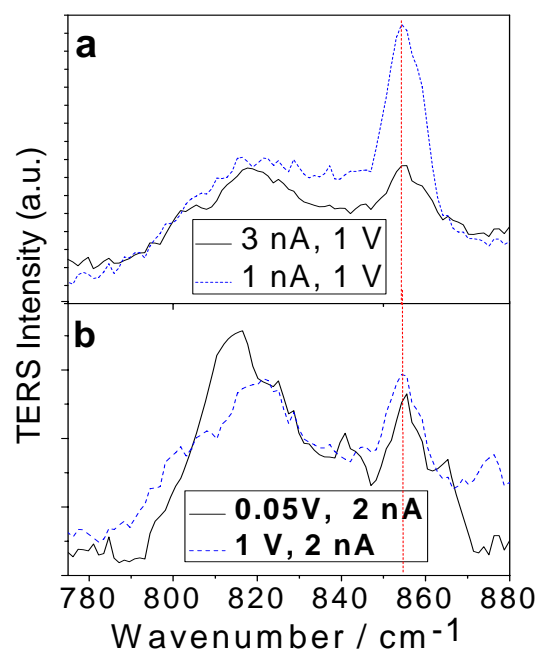

Figure. S3 (a) current and (b) voltage dependent TERS spectra of DMAB around 854 cm<sup>-1</sup> for -NO<sub>2</sub> bending vibrational mode of 4NBT.
